# Supplementary material
Source: PubMed Central journal article supplement (PMC4001381)
Supplement: supp_tpc.113.121822_tpc121822Supplemental.pdf [file supp_tpc.113.121822_tpc121822Supplemental.pdf]

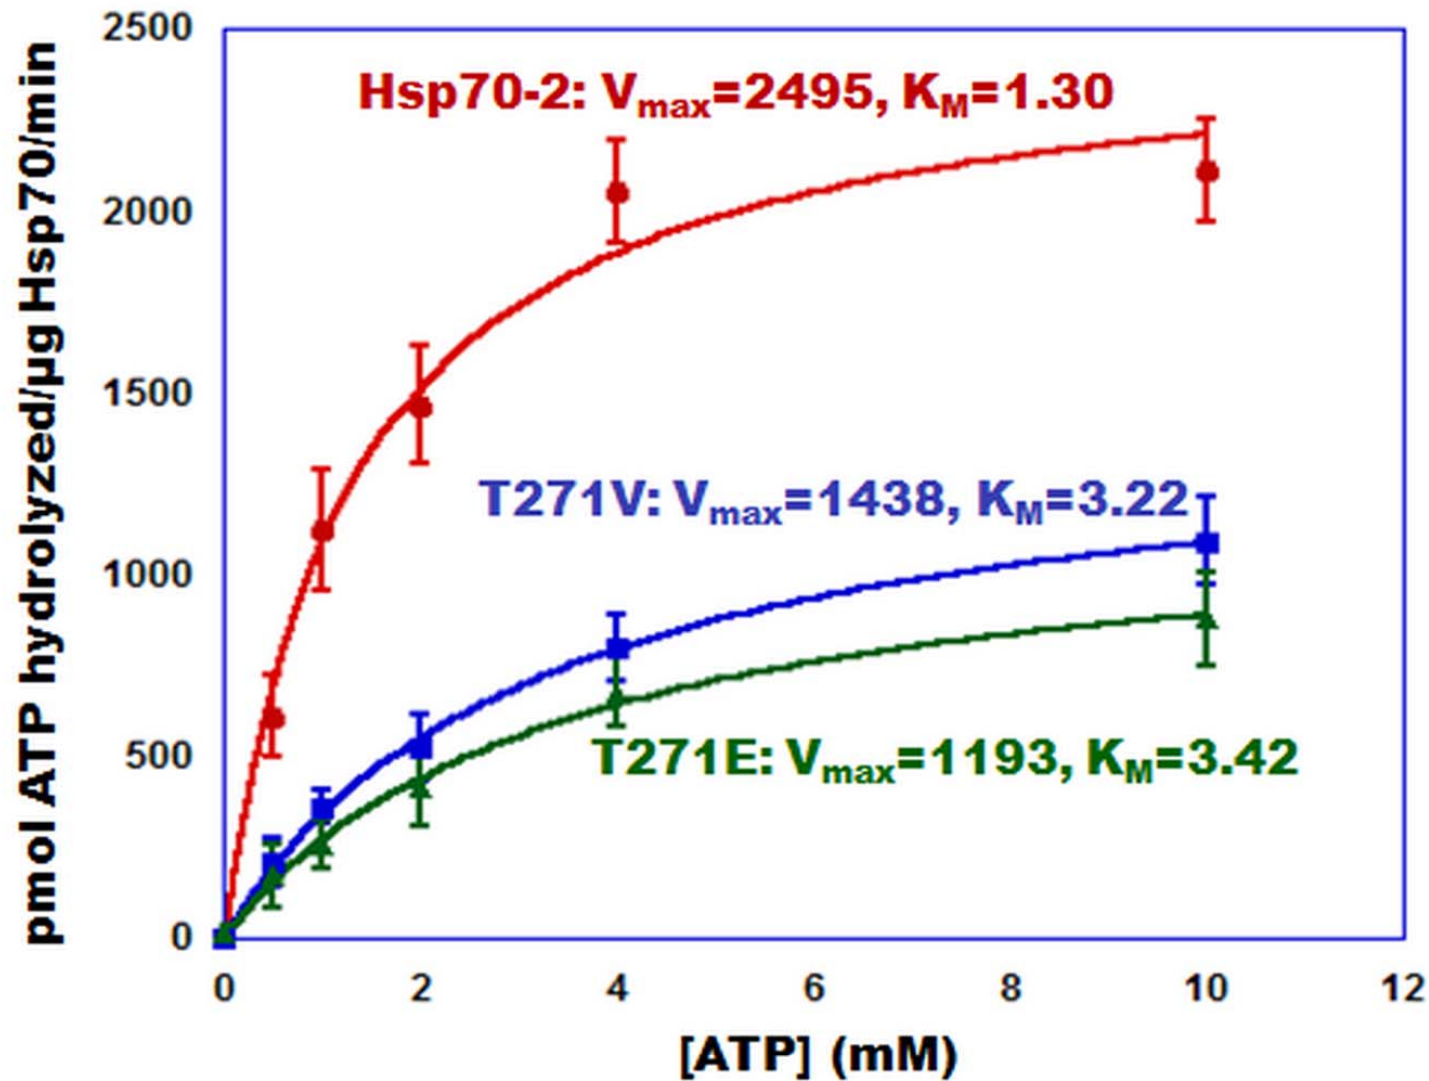

**Figure S1.** Threonine Hsp70 mutants display lower  $V_{max}$  and increased  $K_M$  for ATP hydrolysis compared to wild type using the artificial NR substrate. This experiment was performed exactly as in Fig. 4, except the natural substrate prSSU was replaced with the artificial substrate NRLLLTG at 100 nM.

**Supplemental Table 1. Primers used in the study.**

| <b>Primer name</b> | <b>Sequence (5'-3')</b>           |
|--------------------|-----------------------------------|
| pTYB12-HSP70F      | ACTAGTGAAAAAGTTGTTCGGCATTGATCTT   |
| pTYB12-HSP70R      | GGATCCTCACGTTGAATCAGTGAAGTC       |
| QCTVF              | CTTGGCGGGGGCGTCTTTGATGTTTC        |
| QCTVR              | GAAACATCAAAGACGCCCCCGCCAAG        |
| QCTEF              | GACCTTGGCGGGGGCGAATTTGATGTTTCAGTC |
| QCTER              | GACTGAAACATCAAATTCGCCCCCGCCAAGGTC |
| PpGrpE-1 NdeI_F    | TTCGTCCATATGAGCAGTCATTACAGGCGT    |
| PpGrpE-1 SalI_R    | TTCGTTGTCGACTCACACATTCGCAAGGGC    |
| PpDnaJ EcoRI_F     | GAATTCTGTGGTTATTCATCAAGCACA       |
| PpDnaJ XhoI_R      | CTCGAGTCACCTGGAAGTCCA             |
| G1                 | GGTGGACCATCGGTGTTTTTACTG          |
| G2                 | CCTCCGCAGTCGCTGTAATA              |
| R1                 | TTGGCGTAATCATGGTCATAGCTGT         |
| R2                 | CAACGTCGTGACTGGGAAAACCCT          |

**Supplemental Table 2. Constructs**

| Use                             | Construct    | Plasmid name | Insert or PCR product | Primers                                | Template     | Plasmid backbone | Cloning method |
|---------------------------------|--------------|--------------|-----------------------|----------------------------------------|--------------|------------------|----------------|
| <b>Bacterial overexpression</b> | pTYB12-Hsp70 | pTYB12-Hsp70 | Hsp70-2               | pTYB12-HSP70F/<br>pTYB12-HSP70R        | pART7-Hsp70  | pTYB12           | SpeI /BamHI    |
|                                 | pTYB12-TV    | pTYB12-TV    | -                     | QCTVF/QCTVR                            | pTYB12-Hsp70 | pTYB12           | Quikchange     |
|                                 | pTYB12-TE    | pTYB12-TE    | -                     | QCTEF/ QCTER                           | pTYB12-Hsp70 | pTYB12           | Quikchange     |
|                                 | pTYB12-DnaJ  | pTYB12-DnaJ  | DnaJ                  | PpDnaJ<br>EcoRI_F/<br>PpDnaJ<br>XhoI_R | cDNA         | pTYB12           | EcoRI/XhoI     |
|                                 | pTYB12-CGE   | pTYB12-CGE   | CGE                   | PpGrpE-1<br>NdeI_F/PpGrp<br>E-1 SalI_R | cDNA         | pTYB12           | NdeI/SalI      |
| <b>Moss transformation</b>      | pBJIR4-TV    | pBJIR4-TV    | -                     | QCTVF/QCTVR                            | pBJIR4       | pCR2.1-TOPO      | Quikchange     |
|                                 | pBJIR4-TE    | pBJIR4-TE    | -                     | QCTEF/QCTER                            | pBJIR4       | pCR2.1-TOPO      |                |
